# Supplementary material
Source: PubMed Central journal article supplement (PMC9851260)
Supplement: KAUP_A_2084884_SM5762.pdf [file KAUP_A_2084884_SM5762.pdf]

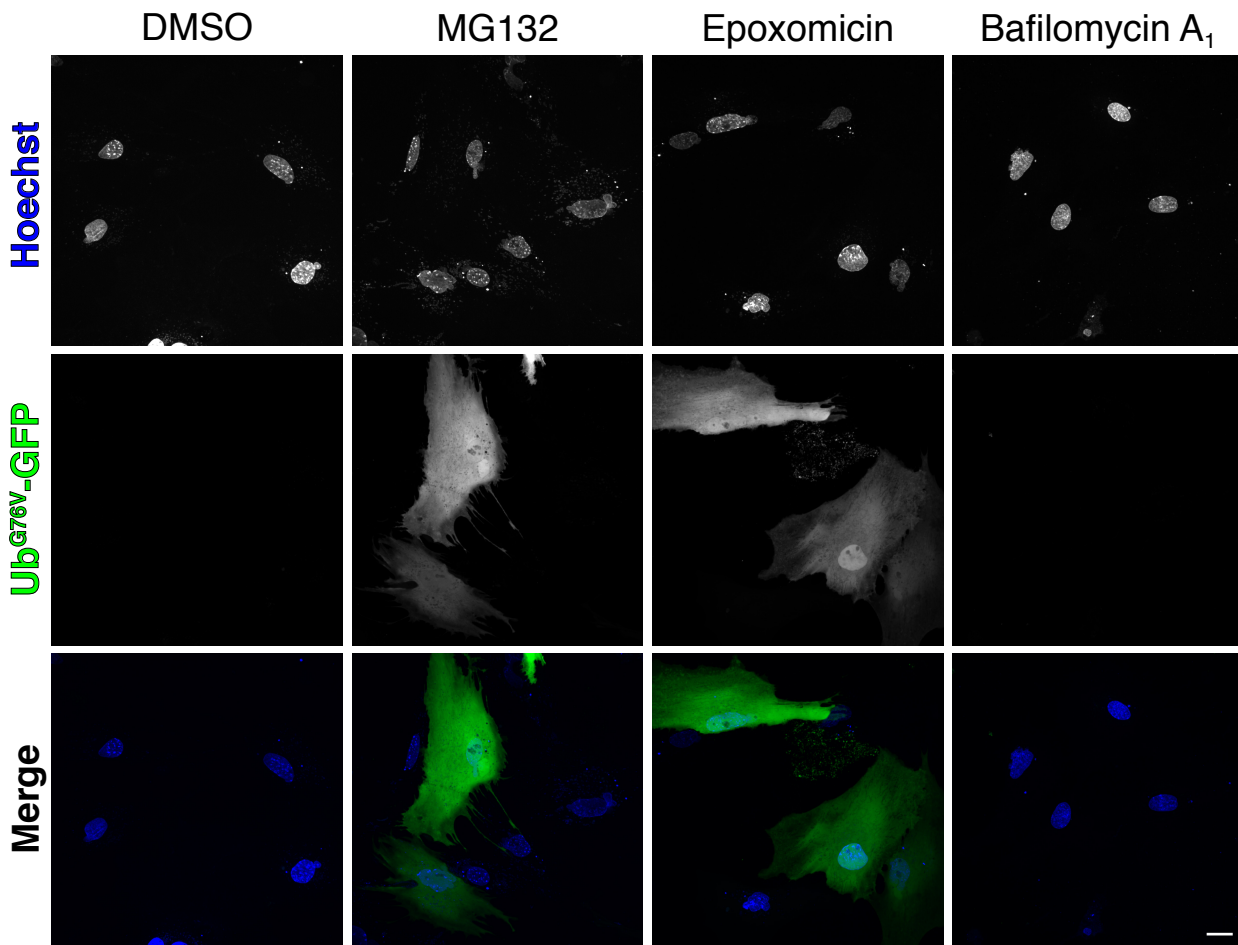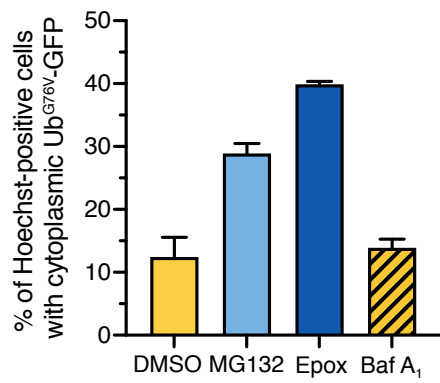

Fig. S1

**Figure S1.** UPS-targeted GFP (Ub<sup>G76V</sup>-GFP) validates UPS inhibition with MG132 and epoxomicin treatments. Live-cell imaging analysis of astrocytes expressing Ub<sup>G76V</sup>-GFP treated with DMSO, 0.5  $\mu$ M MG132 or 10 nM epoxomicin for 24 h, or 100 nM Baf A<sub>1</sub> for 4 h. Images in the Ub<sup>G76V</sup>-GFP channel are grayscale matched to facilitate direct comparisons. Bar: 20  $\mu$ m. Corresponding quantification of the percentage of Hoechst-positive cells with cytoplasmic Ub<sup>G76V</sup>-GFP (means  $\pm$  SEM; n=2 independent experiments; 44-86 cells were analyzed per treatment to generate a percentage for each independent experiment; 6 DIV).



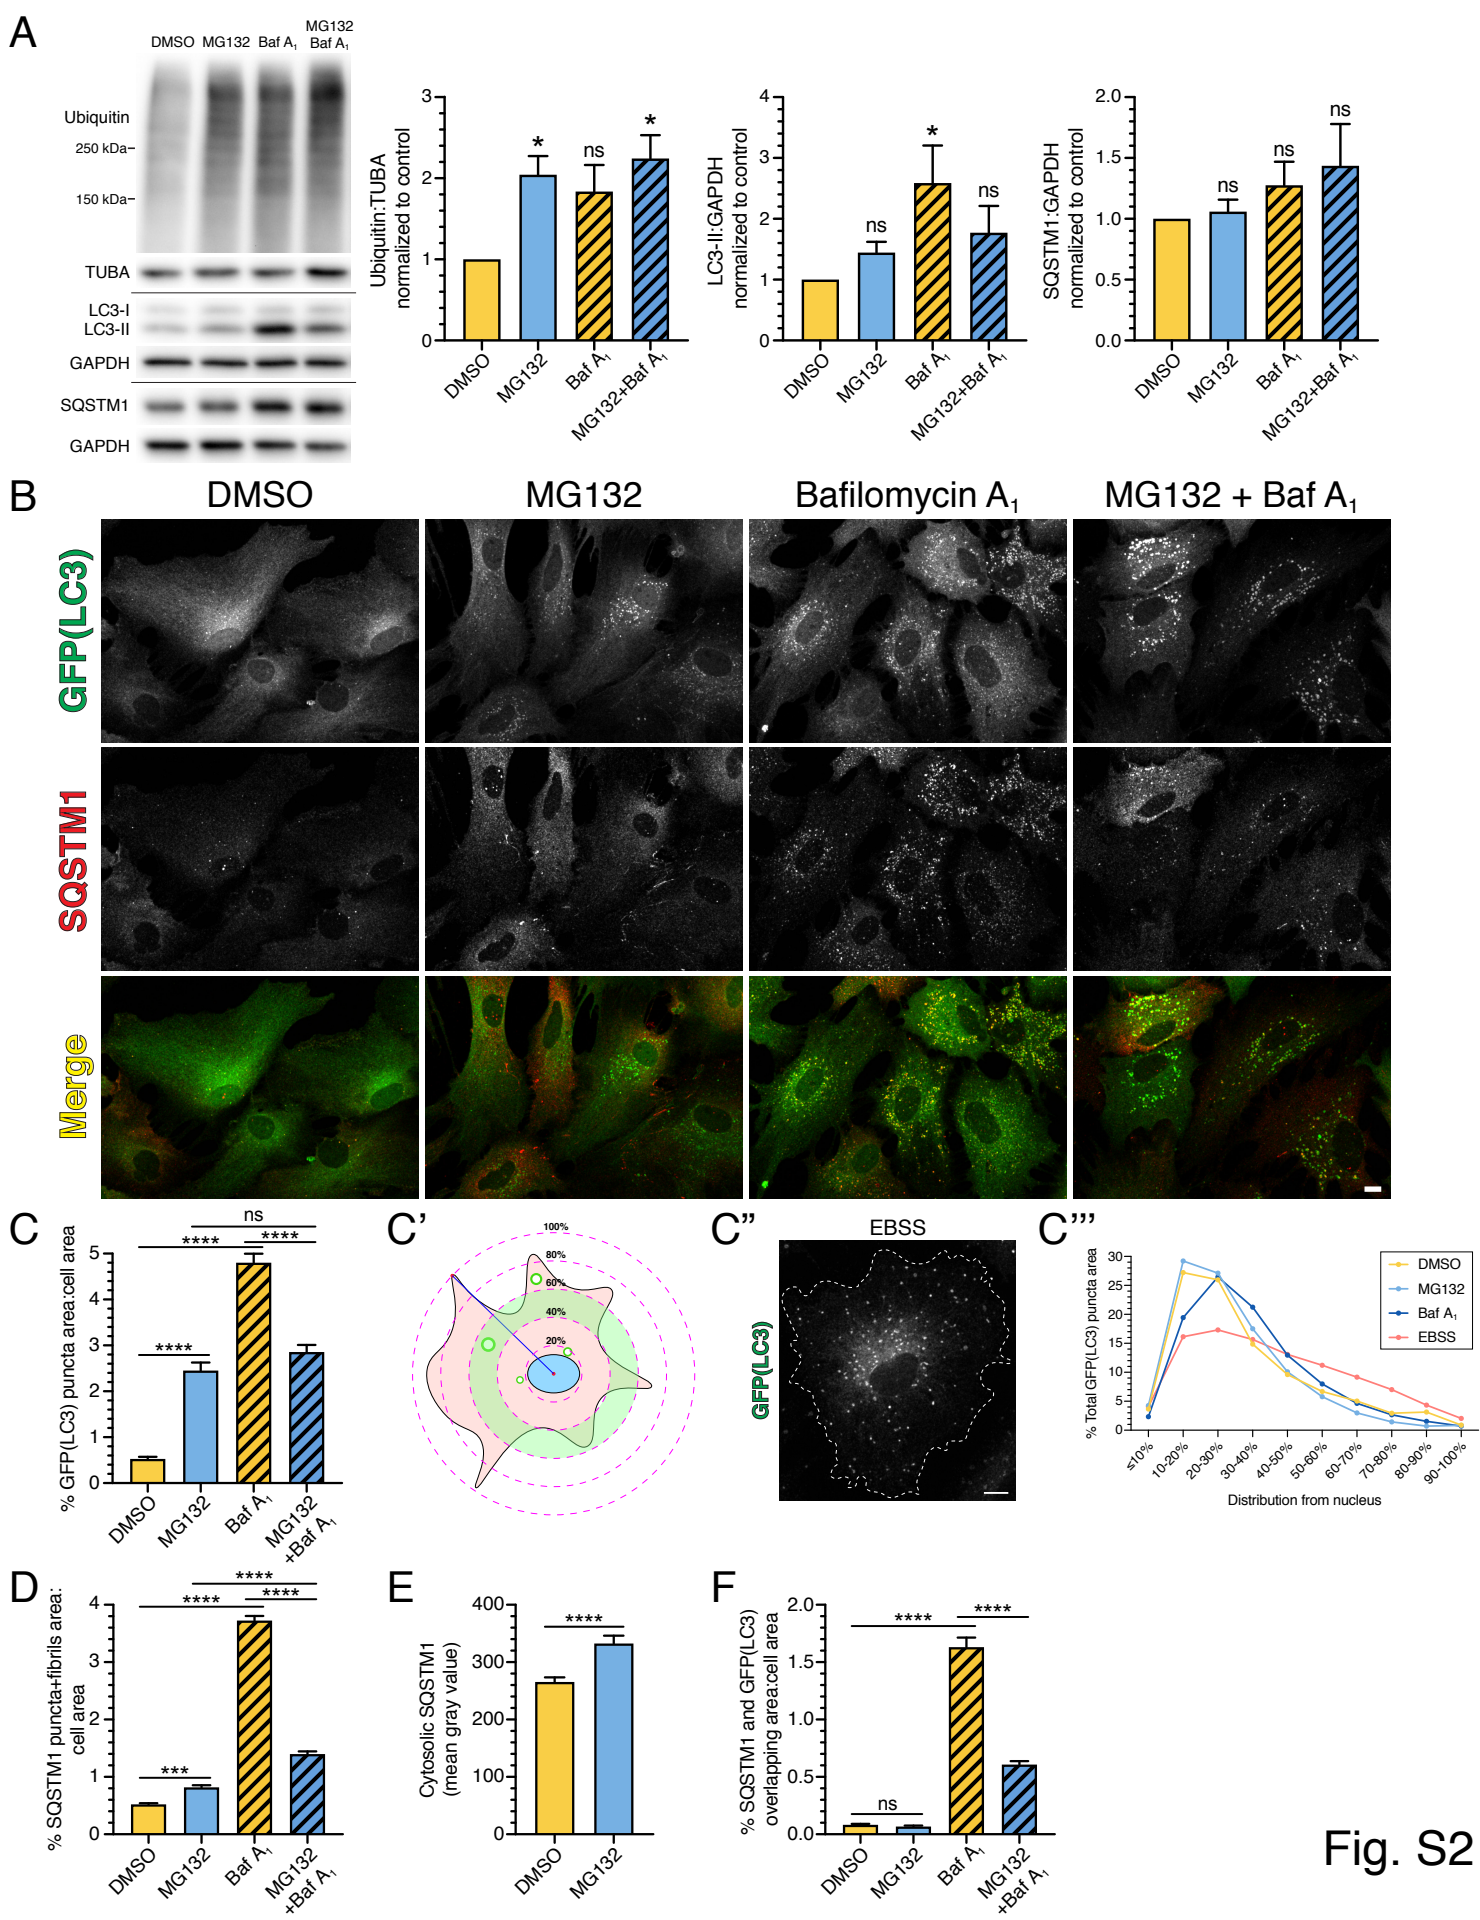

Fig. S2

**Figure S2.** Short-term UPS inhibition with MG132 leads to SQSTM1 fibril formation, but does not robustly upregulate autophagic flux in primary astrocytes. **(A-F)** Analysis of primary astrocytes treated with 50  $\mu$ M MG132 supplemented with 100 nM Baf A<sub>1</sub> (or equivalent volume of DMSO as a solvent control) for 4 h. **(A)** Immunoblot analysis and corresponding quantification of glial lysates. GAPDH and TUBA/ $\alpha$ -tubulin serve as loading controls; horizontal lines designate individual blots. Ubiquitin levels were normalized to TUBA/ $\alpha$ -tubulin, and LC3-II and SQSTM1 levels were normalized to GAPDH (means  $\pm$  SEM; one-way ANOVA with Dunnett's post hoc test; n=3-4 independent experiments; 7-8 DIV). **(B)** Maximum projections of z-stacks of GFP-LC3 transgenic astrocytes immunostained for GFP and SQSTM1. SQSTM1 images are grayscale matched to show an increase in cytosolic SQSTM1 upon UPS inhibition. Bar: 10  $\mu$ m. **(C-F)** Corresponding quantification of immunostain analysis shown in B. **(C)** Quantification of total GFP(LC3) puncta area normalized to cell area (means  $\pm$  SEM; one-way ANOVA with Tukey's post hoc test; n=89-152 cells from 4 independent experiments; 4-5 DIV). **(C', C'', C''')** Quantitation of the distribution of autophagosomes within astrocytes. **(C')** Schematic of the method used to quantify the total GFP(LC3) puncta distributed within astrocytes from the centroid of the nucleus to the furthest point of the cell, at 10% intervals (only 20% intervals are shown in the schematic). **(C'')** Representative image of (GFP)LC3 in an astrocyte starved in EBSS for 4 h as a positive control for the induction of autophagic flux. Bar: 10  $\mu$ m. **(C''')** Quantification using the method in G. Each point represents the pooled distribution of GFP(LC3) puncta measured from 61-103 cells from 3 independent experiments (4-5 DIV). Distribution is measured as the percentage of total GFP(LC3) puncta area localized within each cell region. **(D)** Quantification of total area occupied by SQSTM1 puncta and fibrils normalized to cell area (means  $\pm$  SEM; one-way ANOVA with Tukey's post hoc test; n=90-114 cells from 3 independent experiments; 3-5 DIV). **(E)** Quantification of cytosolic SQSTM1 signal intensity (means  $\pm$  SEM; unpaired t-test; n=115-118 cells from 3 independent experiments; 4-7 DIV). **(F)** Quantification of the percentage of overlapping area between GFP(LC3)-positive and SQSTM1-positive structures normalized to cell area (means  $\pm$  SEM; one-way ANOVA with Tukey's post hoc test; n=83-105 cells from 3 independent experiments; 4-7 DIV).

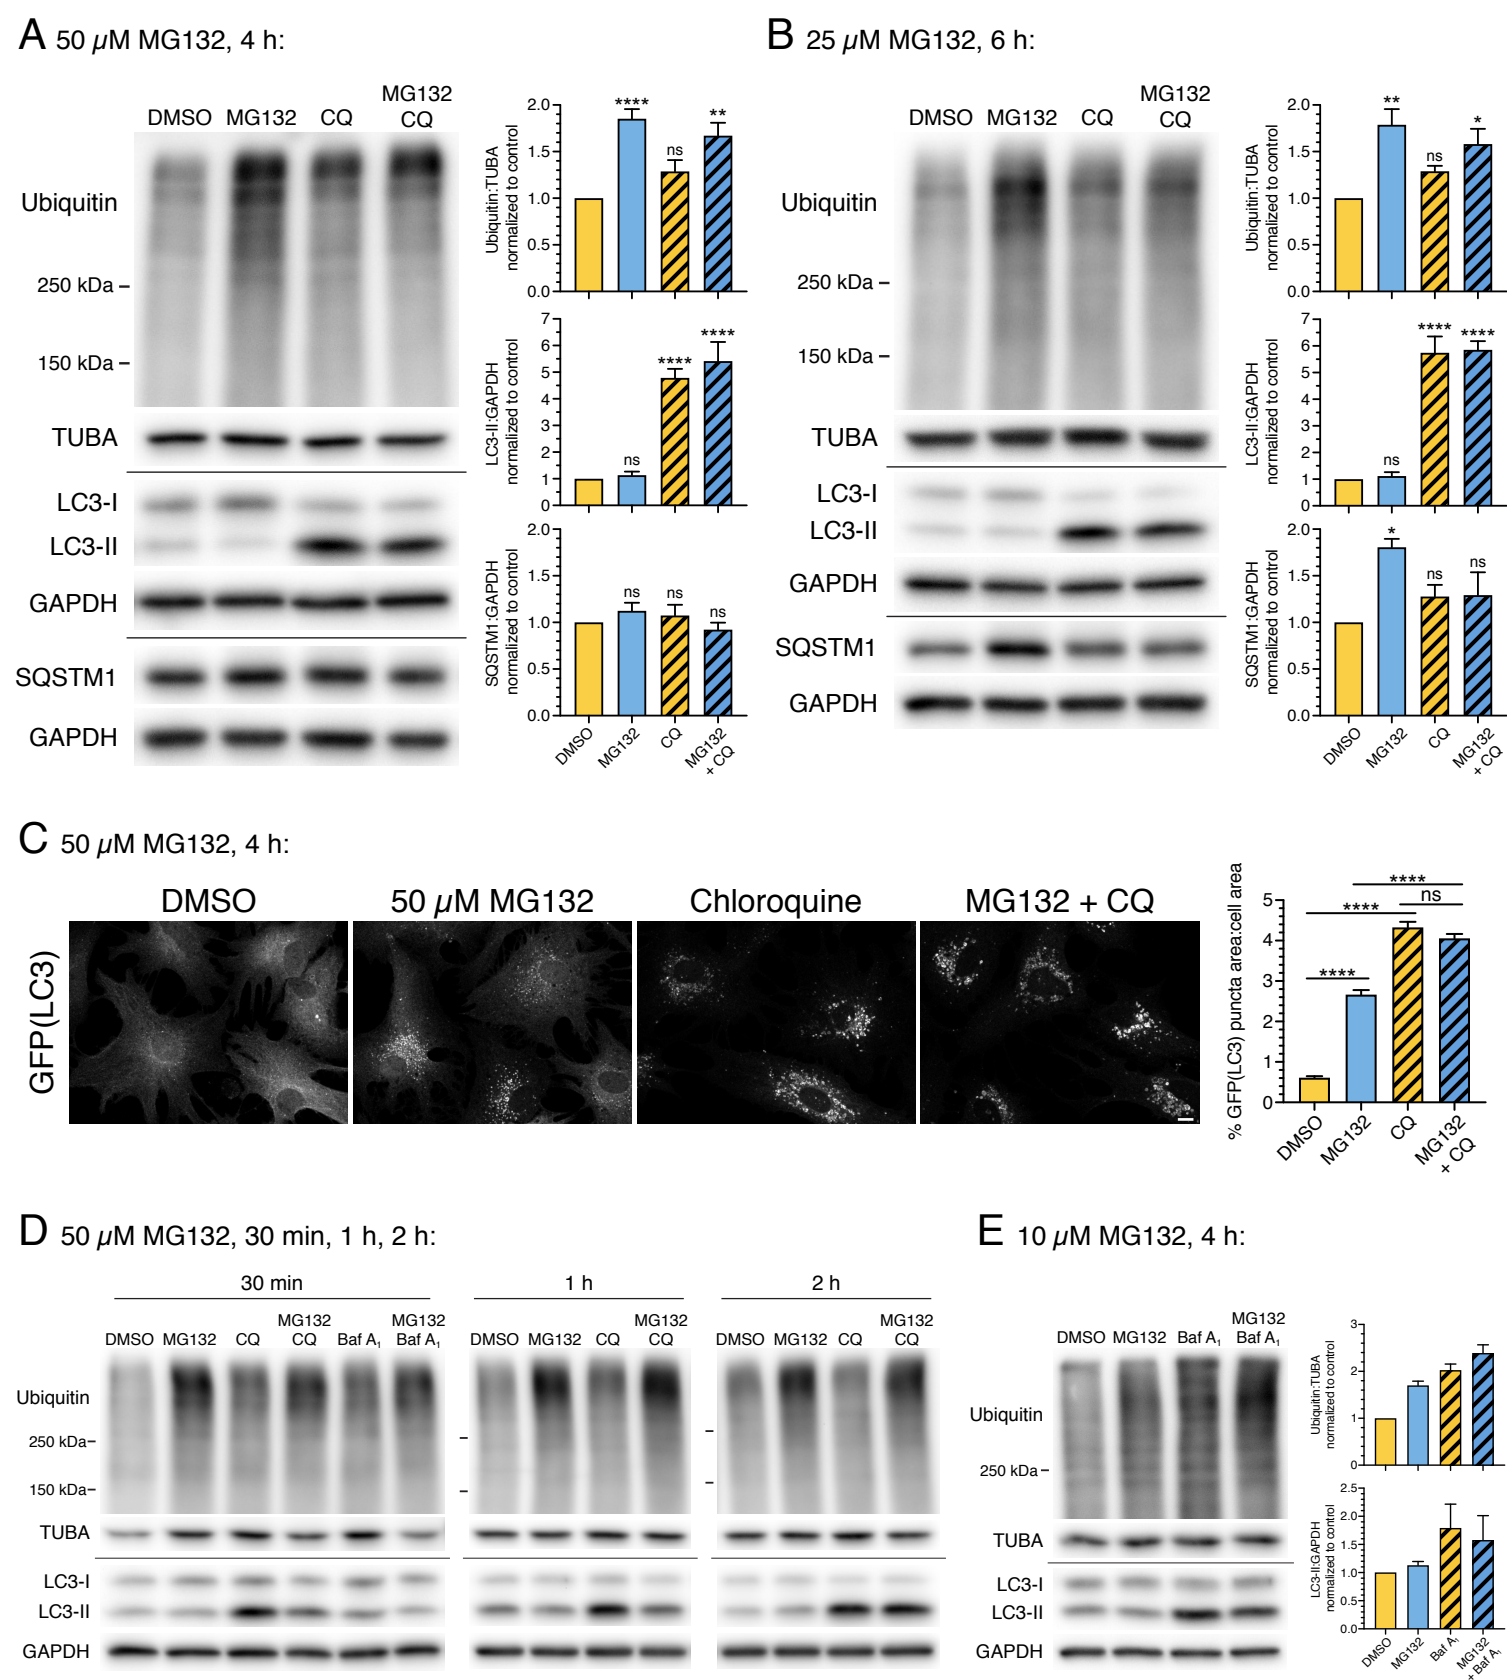

Fig. S3

**Figure S3.** Acute inhibition of the UPS with MG132 does not robustly upregulate autophagic flux in astrocytes. Immunoblot analysis and corresponding quantification of primary astrocytes treated with **(A)** 50  $\mu$ M MG132  $\pm$  50  $\mu$ M CQ for 4 h or **(B)** 25  $\mu$ M MG132  $\pm$  50  $\mu$ M CQ for 6 h. GAPDH and TUBA/ $\alpha$ -tubulin serve as loading controls; horizontal lines designate individual blots. Ubiquitin levels were normalized to TUBA/ $\alpha$ -tubulin, and LC3-II and SQSTM1 levels were normalized to GAPDH. **(A)** Means  $\pm$  SEM; one-way ANOVA with Dunnett's post hoc test; 5-7 independent experiments; 3-7 DIV. **(B)** Means  $\pm$  SEM; one-way ANOVA with Dunnett's post hoc test; 3 independent experiments; 3-8 DIV. **(C)** Maximum projections of z-stacks of GFP-LC3 transgenic astrocytes treated with 50  $\mu$ M MG132  $\pm$  50  $\mu$ M CQ for 4 h and immunostained for GFP. Bar: 10  $\mu$ m. Corresponding quantification of total GFP(LC3) puncta area normalized to cell area (means  $\pm$  SEM; one-way ANOVA with Tukey's post hoc test; n=69-149 cells from 3 independent experiments; 6-8 DIV). **(D)** Immunoblot analysis of primary astrocytes (5-6 DIV) treated with 50  $\mu$ M MG132 for 30 min, 1 h, and 2 h. To measure autophagic flux, samples were co-treated with either 50  $\mu$ M CQ, 100 nM Baf A<sub>1</sub>, or an equivalent volume of solvent. GAPDH and TUBA/ $\alpha$ -tubulin serve as loading controls; horizontal lines designate individual blots. **(E)** Immunoblot analysis of primary astrocytes treated with 10  $\mu$ M MG132  $\pm$  100 nM Baf A<sub>1</sub> for 4 h. GAPDH and TUBA/ $\alpha$ -tubulin serve as loading controls; horizontal lines designate individual blots. Ubiquitin levels were normalized to TUBA/ $\alpha$ -tubulin, and LC3-II levels were normalized to GAPDH (means  $\pm$  SEM; n=2 independent experiments; 4 DIV).

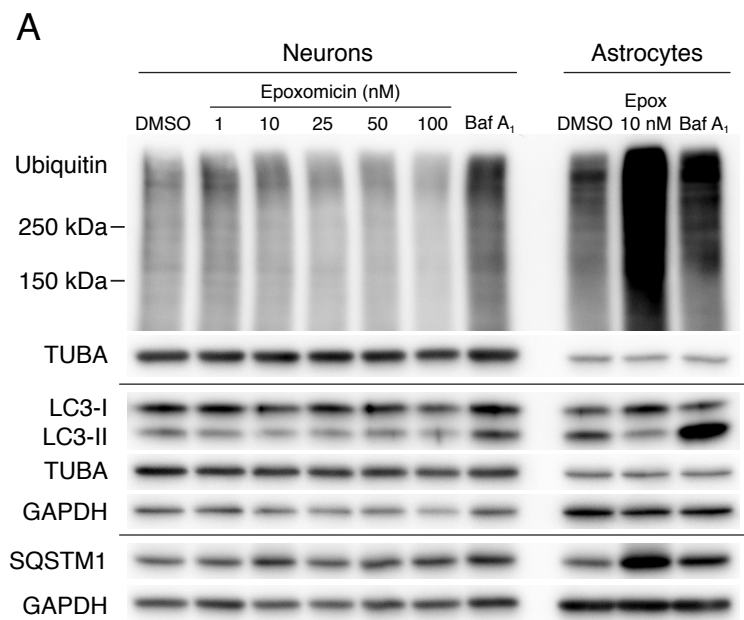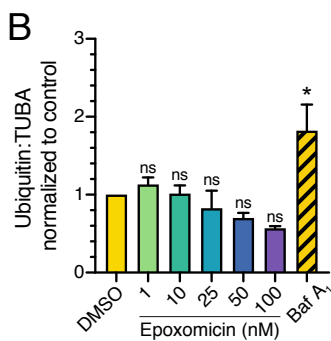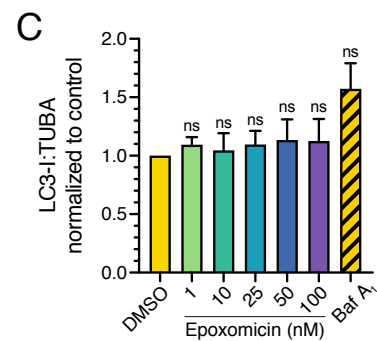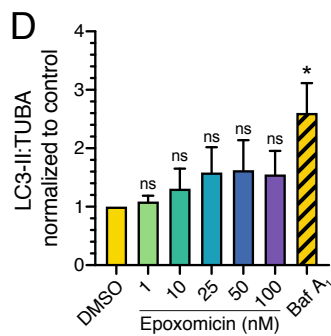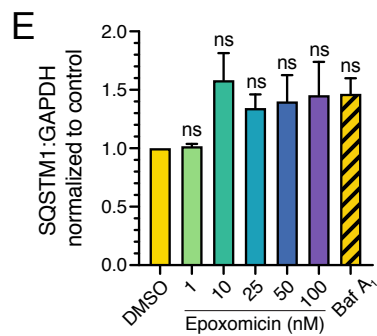

Fig. S4

**Figure S4.** Broader ranges of epoxomicin concentration reveal that UPS inhibition has a reduced effect on SQSTM1 aggresome formation in neurons as compared with astrocytes. **(A-E)** Immunoblot analysis and corresponding quantification of increasing concentrations of epoxomicin (24-h treatment) as compared with 100 nM Baf A<sub>1</sub> for 4 h in primary cortical neurons. GAPDH and TUBA/ $\alpha$ -tubulin serve as loading controls; horizontal lines designate individual blots. Ubiquitin, LC3-I, and LC3-II levels were normalized to TUBA/ $\alpha$ -tubulin, and SQSTM1 levels were normalized to GAPDH (means  $\pm$  SEM; one-way ANOVA with Dunnett's post hoc test; n=3 independent experiments; 8 DIV). Astrocytes were treated with 10 nM epoxomicin for 24 h or 100 nM Baf A<sub>1</sub> for 4 h; 3-6 DIV.



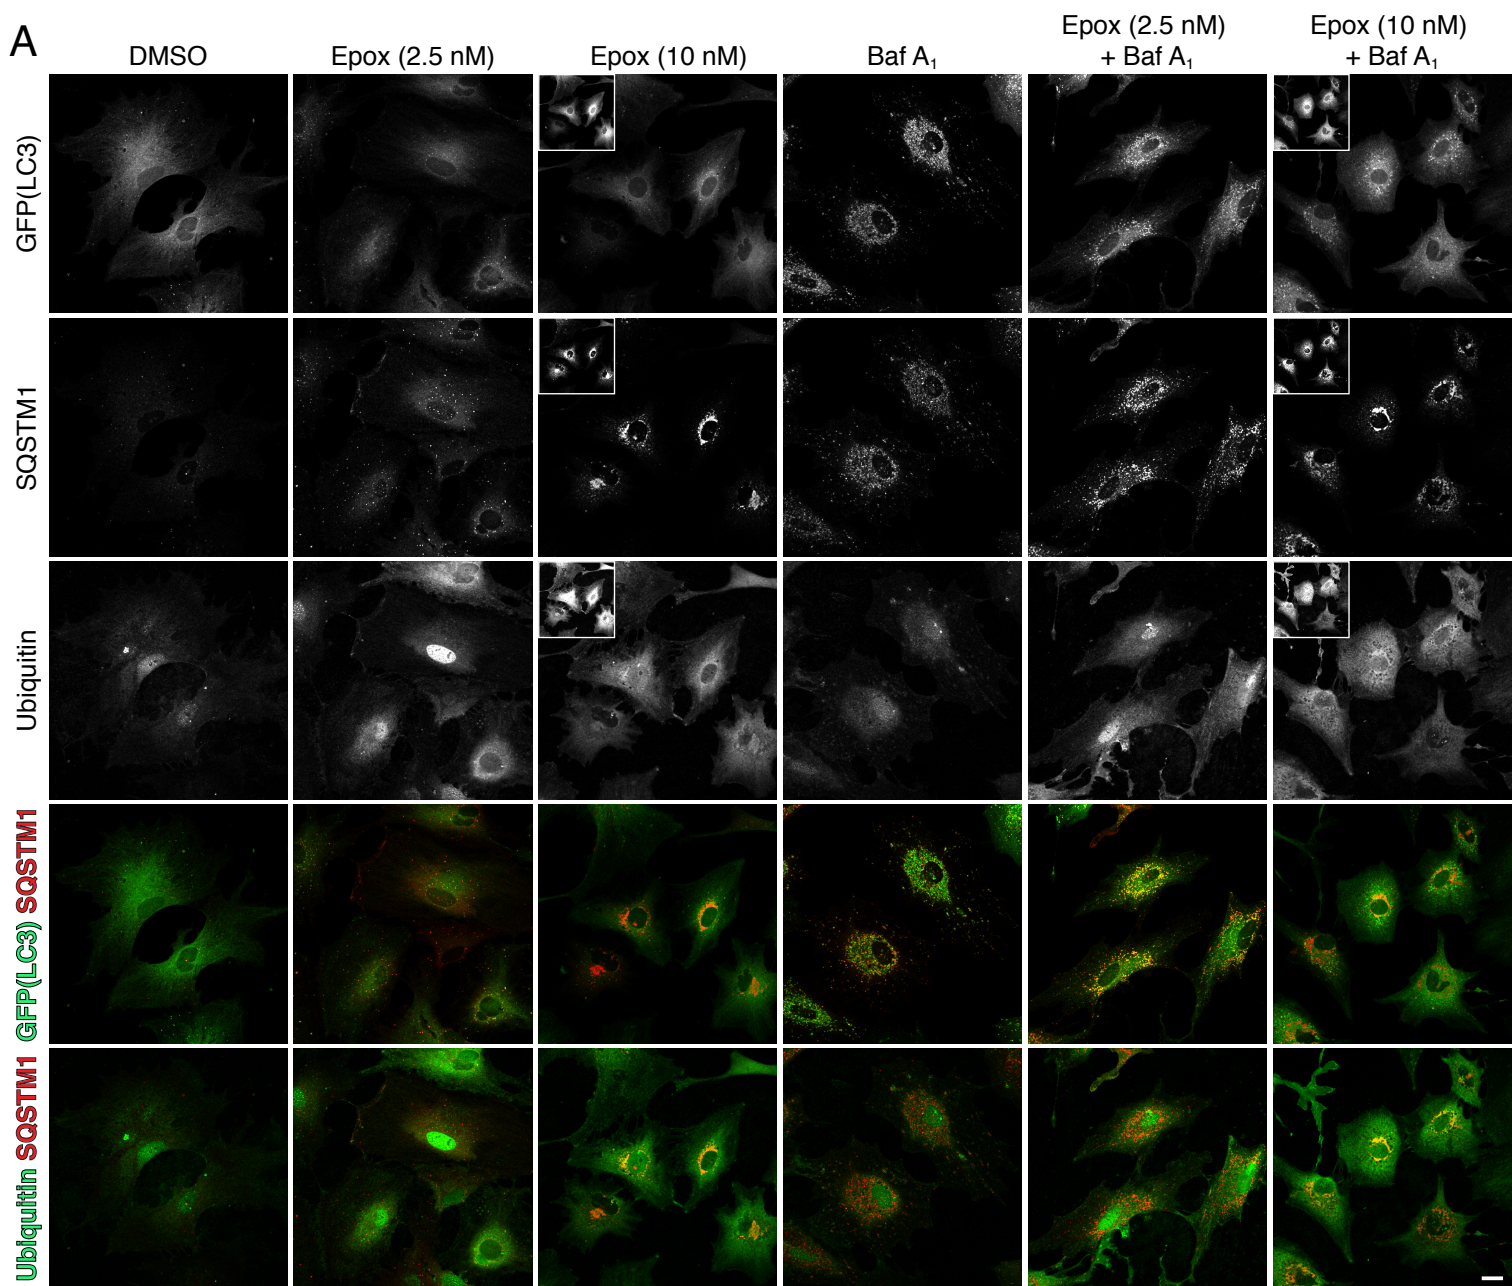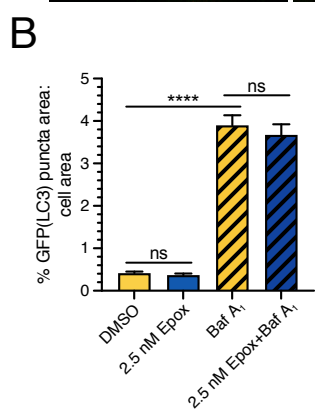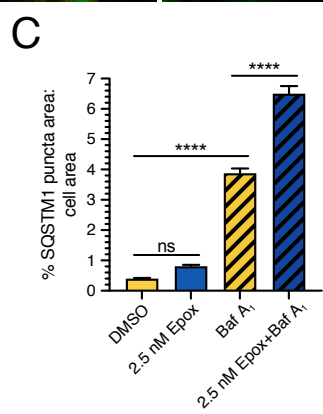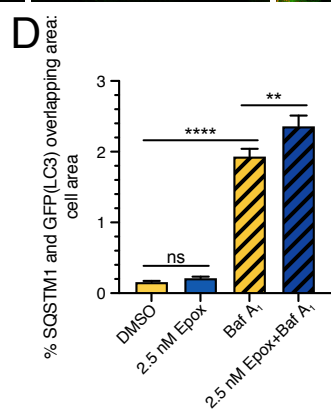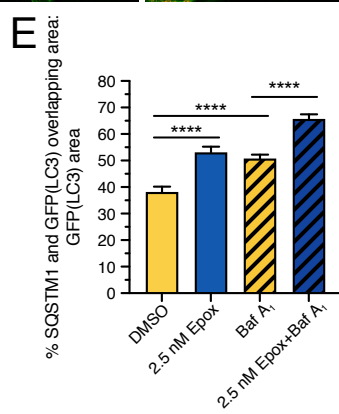

Fig. S5

**Figure S5.** Intermediate paradigms of UPS inhibition result in a modest increase in SQSTM1 targeted to autophagosomes in astrocytes. Primary astrocytes treated with DMSO, 2.5 nM or 10 nM epoxomicin for 24 h; 100 nM Baf A<sub>1</sub> (or an equivalent volume of DMSO as a solvent control) was included in the last 4 h. **(A)** Maximum projections of z-stacks of GFP-LC3 transgenic astrocytes immunostained for GFP, SQSTM1, and ubiquitin. Images within the same marker for LC3, SQSTM1, and Ub are grayscale matched to facilitate direct comparisons; grayscale matched 10 nM epoxomicin images are shown as an inset because they reach saturation. Bar: 20 μm. **(B-E)** Corresponding quantification of immunostain analysis shown in A. **(B)** Quantification of total GFP(LC3) puncta area normalized to cell area (means ± SEM; one-way ANOVA with Tukey's post hoc test; n=70-90 cells from 3 independent experiments; 6 DIV). **(C)** Quantification of total area occupied by SQSTM1 puncta normalized to cell area (means ± SEM; one-way ANOVA with Tukey's post hoc test; n=74-94 cells from 3 independent experiments; 6 DIV). **(D-E)** Quantification of the percentage of overlapping area between GFP(LC3)-positive puncta and SQSTM1-positive structures normalized to **(D)** cell area or **(E)** GFP(LC3) puncta area (means ± SEM; one-way ANOVA with Tukey's post hoc test; n=67-85 cells from 3 independent experiments; 6 DIV).



**A** UPS inhibition, 24 h:

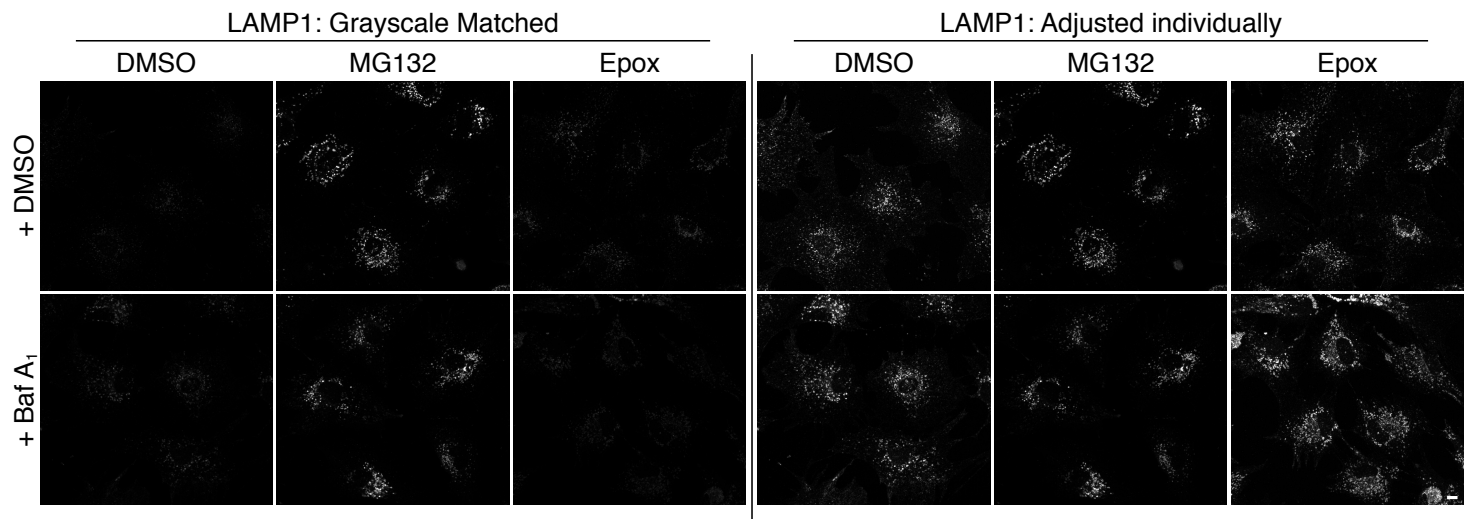

**B** UPS inhibition, 4 h:

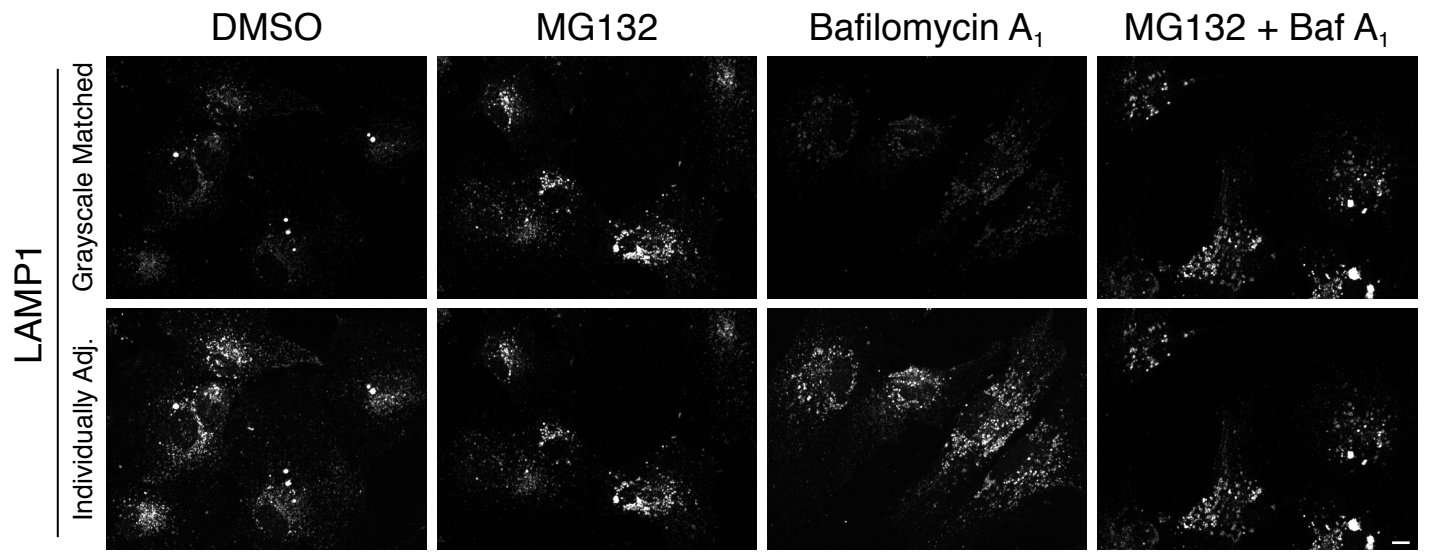

Fig. S6

**Figure S6.** MG132 alters lysosomal characteristics in primary astrocytes. **(A)** Immunostain analysis of primary astrocytes (5-7 DIV) treated with DMSO, 0.5  $\mu$ M MG132 or 10 nM epoxomicin for overnight; 100 nM Baf A<sub>1</sub> (or equivalent volume of DMSO as a solvent control) was included in the last 4 h. Maximum projections of z-stacks of astrocytes immunostained for LAMP1 adjusted either identically, or individually, as indicated. Bar: 10  $\mu$ m. **(B)** Maximum projections of z-stacks of astrocytes (4 DIV) treated with 50  $\mu$ M MG132  $\pm$  100 nM Baf A<sub>1</sub> for 4 h and immunostained for LAMP1. Images were adjusted either identically, or individually, as indicated. Bar: 10  $\mu$ m.

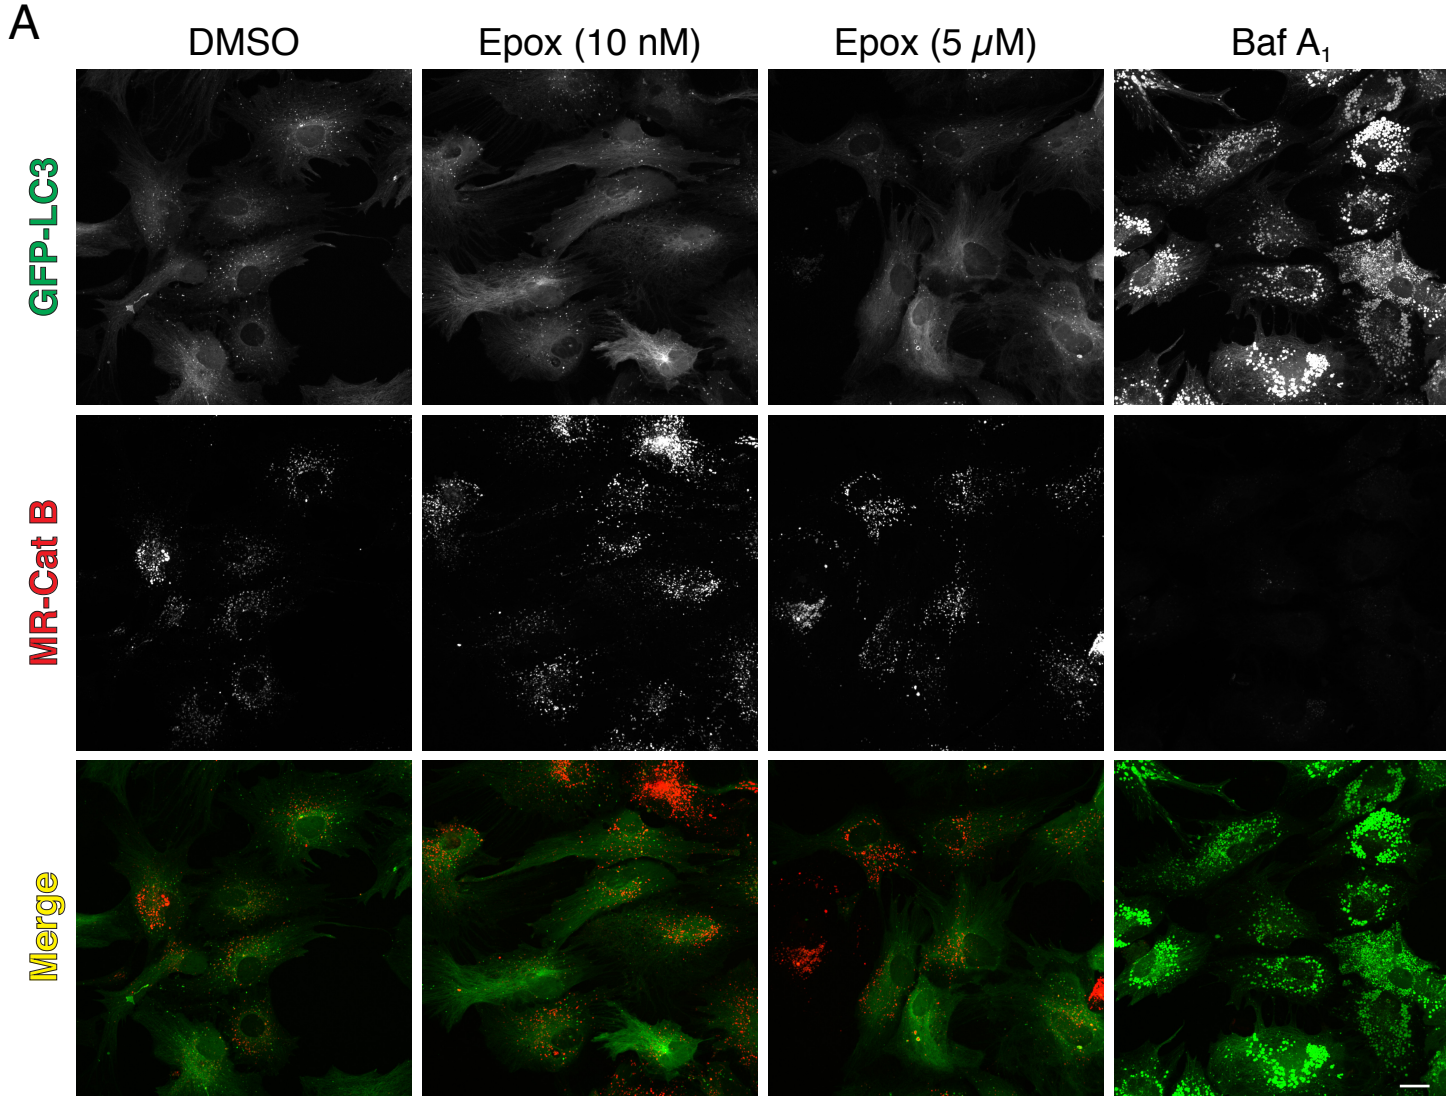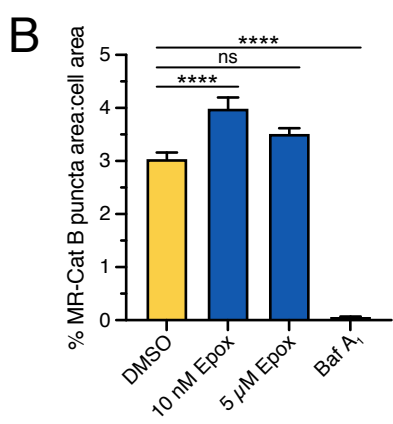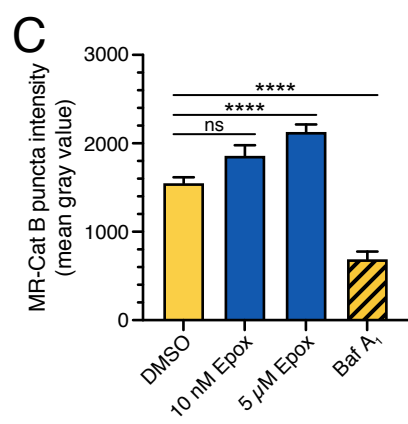

Fig. S7

**Figure S7.** Short-term inhibition of the UPS results in a modest increase in lysosomal function. **(A)** Live-cell imaging analysis of primary astrocytes treated with 10 nM epoxomicin, 5  $\mu$ M epoxomicin, 100 nM Baf A<sub>1</sub>, or equivalent volume of DMSO solvent control for 4 h. Astrocytes are labeled with Magic-Red Cathepsin B substrate (MR-Cat B) for the final 30 min of treatment. Shown are maximum projections of z-stacks. All images within the same marker are grayscale matched to facilitate direct comparisons. Bar: 20  $\mu$ m. **(B)** Corresponding quantitation of total area occupied by MR-Cat B-positive puncta normalized to astrocyte area (means  $\pm$  SEM; one-way ANOVA with Tukey's post hoc test; n=92-96 cells from 3 independent experiments; 4-7 DIV). **(C)** Corresponding quantitation of MR-Cat B puncta intensity (means  $\pm$  SEM; one-way ANOVA with Tukey's post hoc test; n=72-96 cells from 3 independent experiments; 4-7 DIV).
